# Supplementary material for: Influence of Gas Supply Changes on the Formation Process of Complex Mixed Gas Hydrates
Source: MDPI journal article supplement (doi:10.3390/molecules26103039), 2021-05-19
Supplement: s1 [file s1]

## Supporting Information

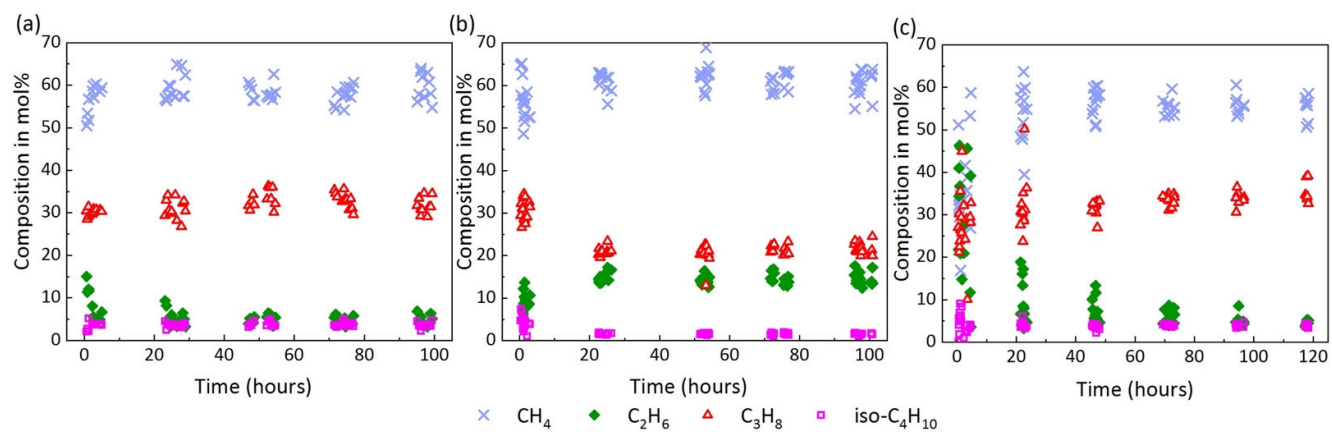

**Figure S1.** Composition changes measured on the surface of mixed hydrate crystals during a repeated test in the open system (Figure S1a), the closed system (Figure S1b), and the semi-closed system (Figure S1c).
